# Supplementary material for: Thermoresponsive polymers in non-aqueous solutions
Source: Royal Society of Chemistry journal article supplement (doi:10.1039/d2py01147f), 2022-01-01
Supplement: d2py01147f1.pdf [file d2py01147f1.pdf]

## Electronic Supporting Information

# Thermoresponsive polymers in non-aqueous solutions

Matilde Concilio<sup>1</sup>, Valentin P. Beyer<sup>1,2</sup>, C. Remzi Becer<sup>1\*</sup>

<sup>1</sup> Department of Chemistry, University of Warwick, Coventry, CV4 7AL, United Kingdom

<sup>2</sup> Polymer Chemistry Laboratory, School of Engineering and Materials Science, Queen Mary University of London, London, E1 4NS, United Kingdom

\*Corresponding author: [remzi.becer@warwick.ac.uk](mailto:remzi.becer@warwick.ac.uk)

**Table S1.** Overview of polymers showing a thermoresponsive behaviour in methanol.

| Solvent | Type of polymer                                                                                                                                                                                             | Polymer conc            | Phase transition type (Temp °C) | Ref. |
|---------|-------------------------------------------------------------------------------------------------------------------------------------------------------------------------------------------------------------|-------------------------|---------------------------------|------|
| MeOH    | Poly( $\gamma$ -4-oligo(ethylene glycol) benzyl-L-glutamate)- <i>random</i> -( $\gamma$ -benzyl-L-glutamate))                                                                                               | 0.2 mg mL <sup>-1</sup> | UCST (@ 4)                      | 110  |
| MeOH    | Poly( $\gamma$ -4-(propoxycarbonyl)benzyl-L-glutamate)-oligo(ethylene glycol) derived from azido functionalized triethylene glycol monomethylether                                                          | 1 mg mL <sup>-1</sup>   | UCST (~ 55)                     | 93   |
| MeOH    | Poly( $\gamma$ -4-(4-propoxyphenoxycarbonyl)benzyl-L-glutamate)-oligo(ethylene glycol) derived from azido functionalized poly(ethylene glycol) methylether 350                                              | 1 mg mL <sup>-1</sup>   | UCST (@ 49.5)                   | 93   |
| MeOH    | Poly( $\gamma$ -4-(2-(2-methoxyethoxy) ethoxycarbonyl)benzyl-L-glutamate)                                                                                                                                   | 1 mg mL <sup>-1</sup>   | UCST (@ 36.4)                   | 98   |
| MeOH    | Poly( $\gamma$ -4-(2-(2-(2-methoxyethoxy) ethoxy)ethoxycarbonyl) benzyl-L-glutamate)                                                                                                                        | 1 mg mL <sup>-1</sup>   | UCST (@ 16.0)                   | 98   |
| MeOH    | Poly( $\gamma$ -propyl-L-glutamate) with <i>p</i> -tolyl pendants and 3-methyl-1,2,3-triazolium iodide linkages                                                                                             | 0.5 mg mL <sup>-1</sup> | UCST (~ 26.8)                   | 99   |
| MeOH    | Poly( $\gamma$ -propyl-L-glutamate) with <i>p</i> -tolyl pendants and 3-methyl-1,2,3-triazolium tetrafluoroborate linkages                                                                                  | 10 mg mL <sup>-1</sup>  | UCST (ND)                       | 99   |
| MeOH    | Poly( $\gamma$ -benzyl-L-glutamate) alkyl conjugates                                                                                                                                                        | 1 mg mL <sup>-1</sup>   | UCST (@ 50-55)                  | 91   |
| MeOH    | Poly( $\gamma$ -propyl-L-glutamate) tetra- <i>O</i> -acetyl-D-(+)-mannopyranoside conjugate                                                                                                                 | 5 mg mL <sup>-1</sup>   | UCST (@ 27.4)                   | 100  |
| MeOH    | Poly( $\gamma$ -propyl-L-glutamate) tetra- <i>O</i> -acetyl-D-(+)-mannopyranoside ( <i>x</i> ) and tetra- <i>O</i> -hydroxyl-D-(+)-mannopyranoside ( <i>y</i> ) conjugate ( <i>x</i> = 85%, <i>y</i> = 15%) | 5 mg mL <sup>-1</sup>   | UCST (@ 33.4)                   | 100  |
| MeOH    | Poly( $\gamma$ -propyl-L-glutamate) tetra- <i>O</i> -acetyl-D-(+)-mannopyranoside ( <i>x</i> ) and tetra- <i>O</i> -hydroxyl-D-(+)-mannopyranoside ( <i>y</i> ) conjugate ( <i>x</i> = 44%, <i>y</i> = 56%) | 5 mg mL <sup>-1</sup>   | UCST (@ 35.0)                   | 100  |
| MeOH    | Carboxyl-containing poly( <i>N</i> -allyl glycine- <i>r</i> - <i>N</i> -octyl glycine)                                                                                                                      | 2 mg mL <sup>-1</sup>   | UCST (@ 50.8)                   | 120  |
| MeOH    | Poly(2-(2-(2-Acetoxyethoxy)ethoxy)ethyl methacrylate)                                                                                                                                                       | 1 wt%                   | UCST (@ 26)                     | 101  |
| MeOH    | Poly(2-(2-(2-(2-hydroxyethoxy)ethoxy)ethoxy)ethyl methacrylate)                                                                                                                                             | 1 wt%                   | UCST (@ 16.2)                   | 101  |
| MeOH    | Poly(2-(2-(2-(2-(2-Acetoxy)ethoxy) ethoxy) ethoxy) ethoxy) ethyl methacrylate)                                                                                                                              | 1 wt%                   | UCST (@ 4.5)                    | 101  |
| MeOH    | Poly( <i>N</i> -propionyl-aspartic acid/ethylene glycol)                                                                                                                                                    | 0.5 wt%                 | UCST (ND)                       | 121  |
| MeOH    | Imidazolium ionic liquid-based nanogels                                                                                                                                                                     | 4.5 wt%                 | UCST (~ 25)                     | 102  |
| MeOH    | Imidazolium ionic liquid-based nanogels                                                                                                                                                                     | 4.5 wt%                 | Sol-gel transition (~ 7)        | 102  |
| MeOH    | Poly( <i>N</i> -cyclopropyl-2-cyano-hex-4-enamide)                                                                                                                                                          | 10 mg mL <sup>-1</sup>  | UCST (~ 63)                     | 103  |
| MeOH    | Poly( <i>N</i> -(6-acetamidopyridin-2-yl)acrylamide)                                                                                                                                                        | 1 mg mL <sup>-1</sup>   | UCST (@ 50)                     | 73   |

|           |                                                                                       |       |                   |     |
|-----------|---------------------------------------------------------------------------------------|-------|-------------------|-----|
| MeOH      | Poly(methyl 4-(2-(acryloyloxy)propanamido)butanoate)                                  | 1 wt% | UCST (@ 6-27)     | 104 |
| MeOH      | Poly(1-(cyclohexylamino)-1-oxopropan-2-yl acrylate)                                   | 1 wt% | UCST (@ -37- -20) | 104 |
| MeOH      | Poly(2-methoxyethyl methacrylate)-Fe <sub>3</sub> O <sub>4</sub> hybrid nanoparticles | n/a   | UCST (~ 19-38)    | 122 |
| MeOH      | Poly(octadecyl vinyl ether- <i>random</i> -2-methoxyethyl vinyl ether)                | 1 wt% | UCST (~ 20)       | 109 |
| MeOH      | Poly( <i>N</i> -(4-vinylbenzyl)- <i>N,N</i> -diethylamine)                            | 2 wt% | LCST (@ 44-53.1)  | 123 |
| MeOH      | Poly( <i>N</i> -(4-vinylbenzyl)- <i>N,N</i> -diethylamine)                            | 2 wt% | LCST (@ 39.5-58)  | 112 |
| MeOD      | Poly( <i>N</i> -(4-vinylbenzyl)- <i>N,N</i> -diethylamine)                            | 2 wt% | LCST (@ 23)       | 112 |
| MeOH/EtOH | Poly( <i>N</i> -(4-vinylbenzyl)- <i>N,N</i> -diethylamine)                            | 2 wt% | LCST (@ 65)       | 112 |

**Table S2.** Overview of polymers showing a thermoresponsive behaviour in ethanol.

| Solvent | Type of polymer                                                                                                                                                          | Polymer conc            | Phase transition type (Temp °C) | Ref. |
|---------|--------------------------------------------------------------------------------------------------------------------------------------------------------------------------|-------------------------|---------------------------------|------|
| EtOH    | Poly(ethylene oxide)                                                                                                                                                     | 0.01-0.165 vol%         | UCST (~ -5-10)                  | 124  |
| EtOH    | Poly( $\gamma$ -4-(propoxycarbonyl)benzyl-L-glutamate)-oligo(ethylene glycol) derived from azido functionalized triethylene glycol monomethylether                       | 1 mg mL <sup>-1</sup>   | UCST (@ 70.5)                   | 93   |
| EtOH    | Poly( $\gamma$ -4-(propoxycarbonyl)benzyl-L-glutamate)-oligo(ethylene glycol) derived from azido functionalized poly(ethylene glycol) methylether 350                    | 1 mg mL <sup>-1</sup>   | UCST (@ 53.1)                   | 93   |
| EtOH    | Poly( $\gamma$ -4-(4-propoxyphenoxy)benzyl-L-glutamate)-oligo(ethylene glycol) derived from azido functionalized poly(ethylene glycol) methylether 350                   | 1 mg mL <sup>-1</sup>   | UCST (@ 64)                     | 93   |
| EtOH    | Poly( $\gamma$ -4-oligo(ethylene glycol) benzyl-L-glutamate)- <i>random</i> -( $\gamma$ -benzyl-L-glutamate))                                                            | 0.2 mg mL <sup>-1</sup> | UCST (@ 27.6-63.1)              | 110  |
| EtOH    | Poly( $\gamma$ -4-(2-(2-methoxyethoxy) ethoxycarbonyl)benzyl- L-glutamate)                                                                                               | 1 mg mL <sup>-1</sup>   | UCST (@ 50.6)                   | 98   |
| EtOH    | Poly( $\gamma$ -4-(2-(2-(2-methoxyethoxy) ethoxy)ethoxycarbonyl) benzyl- L-glutamate)                                                                                    | 1 mg mL <sup>-1</sup>   | UCST (@ 40.6)                   | 98   |
| EtOH    | Polypeptide bearing Azobenzene and triethylene glycol spacers and 1-butylimidazolium side-chain end groups                                                               | 8 mg mL <sup>-1</sup>   | UCST (~ 30)                     | 105  |
| EtOH    | Poly( $\gamma$ -benzyl-L-glutamate) alkyl conjugates                                                                                                                     | 1 mg mL <sup>-1</sup>   | UCST (@ 56.9-71.1)              | 91   |
| EtOH    | Poly( $\gamma$ -propyl-L-glutamate) tetra- <i>O</i> -acetyl-D-(+)-mannopyranoside conjugate                                                                              | 1 mg mL <sup>-1</sup>   | UCST (@ 51.9)                   | 100  |
| EtOH    | Poly( $\gamma$ -propyl-L-glutamate) tetra- <i>O</i> -acetyl-D-(+)-mannopyranoside (x) and tetra- <i>O</i> -hydroxyl-D-(+)-mannopyranoside (y) conjugate (x= 85%, y= 15%) | 1 mg mL <sup>-1</sup>   | UCST (~ 53)                     | 100  |
| EtOH    | Poly( $\gamma$ -propyl-L-glutamate) tetra- <i>O</i> -acetyl-D-(+)-mannopyranoside (x) and tetra- <i>O</i> -hydroxyl-D-(+)-mannopyranoside (y) conjugate (x= 44%, y= 56%) | 1 mg mL <sup>-1</sup>   | UCST (~ 60)                     | 100  |
| EtOH    | Poly(oligo(ethylene glycol) methyl ether methacrylate)                                                                                                                   | 16 mg mL <sup>-1</sup>  | UCST (@ 21.9)                   | 82   |
| EtOH    | Poly(2-(2-(2-acetoxyethoxy)ethoxy)ethyl methacrylate)                                                                                                                    | 1 wt%                   | UCST (@ 55)                     | 101  |
| EtOH    | Poly(2-(2-(2-(2-hydroxyethoxy)ethoxy)ethoxy)ethyl methacrylate)                                                                                                          | 1 wt%                   | UCST (@ 45)                     | 101  |
| EtOH    | Poly(2-(2-(2-(2-(2-acetoxy)ethoxy) ethoxy) ethoxy) ethoxy) ethyl methacrylate)                                                                                           | 1 wt%                   | UCST (@ 36)                     | 101  |
| EtOH    | Poly(2-(2-(2-(2-(2-propionyloxy)ethoxy)ethoxy)ethoxy)ethoxy)ethyl methacrylate)                                                                                          | 1 wt%                   | UCST (@ 27)                     | 101  |
| EtOH    | Poly(2-(2-(2-(2-(2-butyrylacyloxy)ethoxy) ethoxy) ethoxy) ethoxy) ethyl methacrylate)                                                                                    | 1 wt%                   | UCST (@ 8)                      | 101  |
| EtOH    | Poly(2-(2-(2-acetoxyethoxy)ethoxy)ethyl methacrylate)                                                                                                                    | 1 wt%                   | UCST (@ 55)                     | 101  |
| EtOH    | Poly(2-(2-methoxyethoxy)ethyl methacrylate)                                                                                                                              | 2 wt%                   | UCST (@ 13.4-20.6)              | 123  |
| EtOH    | Poly(2-(2-(2-(2-(tetrahydrofuran-2-yl)oxy)ethoxy)-ethoxy)ethoxy) ethyl methacrylate)                                                                                     | 1 wt%                   | UCST (~25)                      | 106  |
| EtOH    | Poly(2-(dimethylamino) ethyl methacrylate- <i>co</i> -methacrylic acid- <i>co</i> -oligo(ethylene glycol) methyl ether methacrylate)                                     | 1 mg mL <sup>-1</sup>   | UCST (~ 10)                     | 107  |

|      |                                                                                  |                        |                           |            |
|------|----------------------------------------------------------------------------------|------------------------|---------------------------|------------|
| EtOH | Poly(2-(dimethylamino)ethyl methacrylate- <i>b</i> -3-phenylpropyl methacrylate) | 21 wt%                 | Sol-gel transition (~ 70) | <b>108</b> |
| EtOH | Poly(methyl acrylate)                                                            | 5 mg mL <sup>-1</sup>  | UCST (@ 60)               | <b>125</b> |
| EtOH | Poly(styrene- <i>b</i> -methyl acrylate)                                         | 5 mg mL <sup>-1</sup>  | UCST (~ 70)               | <b>125</b> |
| EtOH | Poly(methyl acrylate- <i>b</i> -diethylene glycol ethyl ether acrylate)          | 5 mg mL <sup>-1</sup>  | UCST (~5)                 | <b>84</b>  |
| EtOH | Poly(1-(benzylamino)-1-oxopropan-2-yl acrylate)                                  | 1 wt%                  | UCST (@ 55-74)            | <b>104</b> |
| EtOH | Poly(methyl 4-(2-(acryloyloxy)propanamido)butanoate)                             | 1 wt%                  | UCST (@ 6-19)             | <b>104</b> |
| EtOH | Poly(1-cyano- <i>N</i> -propylcarboxyamidovinylcyclopropane)                     | 1 mg mL <sup>-1</sup>  | UCST (~34)                | <b>126</b> |
| EtOH | Poly( <i>N</i> -isopropyl-2-cyano-4-enamide)                                     | 10 mg mL <sup>-1</sup> | UCST (@ 40)               | <b>103</b> |
| EtOH | Poly( <i>N</i> -butyl-2-cyano-4-enamide)                                         | 10 mg mL <sup>-1</sup> | UCST (@ 23)               | <b>103</b> |
| EtOH | Poly( <i>N</i> -hexyl-2-cyano-4-enamide)                                         | 10 mg mL <sup>-1</sup> | UCST (@ 15)               | <b>103</b> |
| EtOH | Poly( <i>N</i> -(2-ethyl)hexyl-2-cyano-4-enamide)                                | 10 mg mL <sup>-1</sup> | UCST (@ 25)               | <b>103</b> |
| EtOH | Poly(2-nonyl-2-oxazoline)                                                        | 5 mg mL <sup>-1</sup>  | UCST (~ 48)               | <b>86</b>  |
| EtOH | Poly(2-benzyl-2-oxazoline)                                                       | 5 mg mL <sup>-1</sup>  | UCST (~ -12)              | <b>86</b>  |
| EtOH | Poly(2-phenyl-2-oxazoline)                                                       | 5 mg mL <sup>-1</sup>  | UCST (@ 48.1)             | <b>88</b>  |
| EtOH | Poly(2-phenyl-2-oxazoline)                                                       | 5 mg mL <sup>-1</sup>  | UCST (~ 40)               | <b>89</b>  |
| EtOH | Poly(2-nonyl-2-oxazoline- <i>stat</i> -2-phenyl-2-oxazoline)                     | 5 mg mL <sup>-1</sup>  | UCST (~ 10)               | <b>89</b>  |
| EtOH | Poly(octadecyl vinyl ether- <i>random</i> -2-methoxyethyl vinyl ether)           | 1 wt%                  | UCST (~ 25)               | <b>109</b> |

**Table S3.** Overview of polymers showing a thermoresponsive behaviour in 1-propanol.

| Solvent   | Type of polymer                                                                                                                                                | Polymer conc            | Phase transition type (Temp °C) | Ref.       |
|-----------|----------------------------------------------------------------------------------------------------------------------------------------------------------------|-------------------------|---------------------------------|------------|
| PrOH      | Poly(( $\gamma$ -4-oligo(ethylene glycol) benzyl-L-glutamate)- <i>random</i> -( $\gamma$ -benzyl-L-glutamate))                                                 | 0.2 mg mL <sup>-1</sup> | UCST (@ 25.6-90)                | <b>110</b> |
| PrOH      | Poly( $\gamma$ -4-(propoxycarbonyl)benzyl-L-glutamate)-oligo(ethylene glycol) derived from azido functionalized triethylene glycol monomethylether             | 1 mg mL <sup>-1</sup>   | UCST (@72.5)                    | <b>93</b>  |
| PrOH      | Poly( $\gamma$ -4-(propoxycarbonyl)benzyl-L-glutamate)-oligo(ethylene glycol) derived from azido functionalized poly(ethylene glycol) methylether 350          | 1 mg mL <sup>-1</sup>   | UCST (@55.5)                    | <b>93</b>  |
| PrOH      | Poly( $\gamma$ -4-(4-propoxyphenoxycarbonyl)benzyl-L-glutamate)-oligo(ethylene glycol) derived from azido functionalized poly(ethylene glycol) methylether 350 | 1 mg mL <sup>-1</sup>   | UCST (@65.6)                    | <b>93</b>  |
| PrOH      | Poly( $\gamma$ -4-(2-(2-methoxyethoxy) ethoxycarbonyl)benzyl- L-glutamate)                                                                                     | 1 mg mL <sup>-1</sup>   | UCST (@ 52.4)                   | <b>98</b>  |
| PrOH      | Poly( $\gamma$ -4-(2-(2-(2-methoxyethoxy) ethoxy)ethoxycarbonyl) benzyl- L-glutamate)                                                                          | 1 mg mL <sup>-1</sup>   | UCST (@ 40.7)                   | <b>98</b>  |
| PrOH      | Poly( $\gamma$ -propyl-L-glutamate) tetra-O-acetyl-D-(+)-mannopyranoside                                                                                       | 1 mg mL <sup>-1</sup>   | UCST (@ 58.3)                   | <b>100</b> |
| PrOH      | Poly(oligo(ethylene glycol) methyl ether methacrylate)                                                                                                         | 16 mg mL <sup>-1</sup>  | UCST (@ 29.1)                   | <b>82</b>  |
| PrOH      | Poly(2-(2-(2-(2-((tetrahydrofuran-2-yl)oxy)ethoxy)ethoxy)ethoxy) ethyl methacrylate)                                                                           | 1 wt%                   | UCST (~ 22)                     | <b>106</b> |
| PrOH      | Poly(2-hydroxyethyl methacrylate)                                                                                                                              | 1 wt%                   | UCST (@ 35.8-45.9)              | <b>111</b> |
| PrOH      | Poly( <i>N</i> -(4-vinylbenzyl)- <i>N,N</i> -dibutylamine)                                                                                                     | 2 wt%                   | UCST (@ 48.0)                   | <b>112</b> |
| PrOH/BuOH | Poly( <i>N</i> -(4-vinylbenzyl)- <i>N,N</i> -dibutylamine)                                                                                                     | 2 wt%                   | UCST (@ 29.0)                   | <b>112</b> |
| PrOH/MeOH | Poly( <i>N</i> -(4-vinylbenzyl)- <i>N,N</i> -dibutylamine)                                                                                                     | 2 wt%                   | UCST (@ 75.0)                   | <b>112</b> |

|           |                                                            |       |               |     |
|-----------|------------------------------------------------------------|-------|---------------|-----|
| PrOH/EtOH | Poly( <i>N</i> -(4-vinylbenzyl)- <i>N,N</i> -dibutylamine) | 2 wt% | UCST (@ 75.0) | 112 |
|-----------|------------------------------------------------------------|-------|---------------|-----|

**Table S4.** Overview of polymers showing a thermoresponsive behaviour in 2-propanol.

| Solvent            | Type of polymer                                                                                                                                                                                               | Polymer conc           | Phase transition type (Temp °C) | Ref. |
|--------------------|---------------------------------------------------------------------------------------------------------------------------------------------------------------------------------------------------------------|------------------------|---------------------------------|------|
| <i>i</i> PrOH      | Poly( $\gamma$ -propyl-L-glutamate) tetra- <i>O</i> -acetyl-D-(+)-mannopyranoside conjugate                                                                                                                   | 1 mg mL <sup>-1</sup>  | UCST (@ 62.2)                   | 100  |
| <i>i</i> PrOH      | Poly( $\gamma$ -4-(propoxycarbonyl)benzyl-L-glutamate)-oligo(ethylene glycol) derived from azido functionalized triethylene glycol monomethylether                                                            | 1 mg mL <sup>-1</sup>  | UCST (@ 74.7)                   | 93   |
| <i>i</i> PrOH      | Poly( $\gamma$ -4-(propoxycarbonyl)benzyl-L-glutamate)-oligo(ethylene glycol) derived from azido functionalized poly(ethylene glycol) methylether 350                                                         | 1 mg mL <sup>-1</sup>  | UCST (@ 58)                     | 93   |
| <i>i</i> PrOH      | Poly( $\gamma$ -4-(4-propoxyphenoxy)benzyl-L-glutamate)-oligo(ethylene glycol) derived from azido functionalized poly(ethylene glycol) methylether 350                                                        | 1 mg mL <sup>-1</sup>  | UCST (@ 66.6)                   | 93   |
| <i>i</i> PrOH      | Poly(ethylene glycol) 6 kDa                                                                                                                                                                                   | 5 mg mL <sup>-1</sup>  | UCST (@ 41.5)                   | 127  |
| <i>i</i> PrOH      | Poly(ethylene glycol) 6 kDa                                                                                                                                                                                   | 0.050 wt%              | UCST (@ 21)                     | 113  |
| <i>i</i> PrOH      | Poly(acrylic acid)/poly(ethylene glycol) blend                                                                                                                                                                | 0.0625/0.050 wt%       | UCST (@ 48)                     | 113  |
| <i>i</i> PrOH      | Poly(poly(ethylene glycol) methacrylate)                                                                                                                                                                      | 0.0625 wt%             | UCST (< 5)                      | 113  |
| <i>i</i> PrOH      | Poly(acrylic acid)/poly(poly(ethylene glycol) methacrylate) blend                                                                                                                                             | 0.0625/0.0625 wt%      | UCST (@ 42)                     | 113  |
| <i>i</i> PrOH/MeOH | Poly(acrylic acid)-poly(ethylene glycol) blend                                                                                                                                                                | 0.0625/0.050 wt%       | UCST (~ 54-45)                  | 113  |
| <i>i</i> PrOH/MeOH | Poly(acrylic acid)-poly(poly(ethylene glycol) methacrylate) blend                                                                                                                                             | 0.0625/0.0625 wt%      | UCST (~ 42-22)                  | 113  |
| <i>i</i> PrOH      | Poly((ethylene glycol) methyl ether methacrylate- <i>b</i> -methyl methacrylate)                                                                                                                              | 3 wt%                  | UCST (~ 24)                     | 114  |
| <i>i</i> PrOH      | Poly((ethylene glycol) methyl ether methacrylate- <i>b</i> -methyl methacrylate- <i>b</i> -4-(diphenylphosphino)styrene-Ru(II))                                                                               | 3 wt%                  | UCST (~ 27)                     | 114  |
| <i>i</i> PrOH      | PEG-armed star polymers<br>Poly((ethylene glycol) methyl ether methacrylate- <i>b</i> -methyl methacrylate- <i>b</i> -ethylene glycol dimethyl acrylate)                                                      | 3 wt%                  | UCST (~ 30)                     | 114  |
| <i>i</i> PrOH      | PEG-armed Ru(II)-star polymers<br>Poly((ethylene glycol) methyl ether methacrylate- <i>b</i> -methyl methacrylate- <i>b</i> -ethylene glycol dimethylacrylate- <i>b</i> -4-(diphenylphosphino)styrene-Ru(II)) | 3 wt%                  | UCST (~ 31)                     | 114  |
| <i>i</i> PrOH      | Poly(oligo(ethylene glycol) methyl ether methacrylate 6.3 kDa)                                                                                                                                                | 5 mg mL <sup>-1</sup>  | UCST (@ 10.8)                   | 115  |
| <i>i</i> PrOH      | Poly(ethylene glycol) methyl ether methacrylate 17.1 kDa                                                                                                                                                      | 3 wt%                  | UCST (~ 23)                     | 114  |
| <i>i</i> PrOH      | Poly(oligo(ethylene glycol) methyl ether methacrylate 23.2 kDa)                                                                                                                                               | 5 mg mL <sup>-1</sup>  | UCST (@ 35.6)                   | 82   |
| <i>i</i> PrOH      | Poly(oligo(ethylene glycol) phenyl ether acrylate- <i>co</i> -oligo(ethylene glycol) methyl ether methacrylate)                                                                                               | 10 mg mL <sup>-1</sup> | UCST (@ 35.1-75.4)              | 83   |
| <i>i</i> PrOH      | Poly(oligo(ethylene glycol) methyl ether methacrylate- <i>b</i> - <i>N</i> -isopropylacrylamide)                                                                                                              | 5 mg mL <sup>-1</sup>  | UCST (< 0)                      | 115  |
| <i>i</i> PrOH      | Poly(oligo(ethylene glycol) methyl ether methacrylate- <i>b</i> - <i>N</i> -isopropylacrylamide)                                                                                                              | 20 mg mL <sup>-1</sup> | UCST (@ 10.6)                   | 128  |
| <i>i</i> PrOH      | Poly(oligo(ethylene glycol) methyl ether methacrylate- <i>b</i> - <i>N,N</i> -diethylacrylamide)                                                                                                              | 5 mg mL <sup>-1</sup>  | UCST (@ 0.5)                    | 115  |
| <i>i</i> PrOH      | Poly(oligo(ethylene glycol) methyl ether methacrylate- <i>b</i> - <i>N,N</i> -diethylacrylamide)                                                                                                              | 20 mg mL <sup>-1</sup> | UCST (@ 11.8)                   | 128  |
| <i>i</i> PrOH      | Poly(2-(dimethylamino) ethyl methacrylate- <i>co</i> -methacrylic acid))- <i>graft</i> -oligo(ethylene glycol) methyl ether methacrylate                                                                      | 1 mg mL <sup>-1</sup>  | UCST (@ 50)                     | 107  |
| <i>i</i> PrOH      | Poly(vinylidene fluoride)- <i>graft</i> -poly(diethylene glycol methyl ether methacrylate)                                                                                                                    | 0.09 %w/v              | UCST (@ 27.5)                   | 85   |
| <i>i</i> PrOH      | Poly(2-(2-methoxyethoxy)ethyl methacrylate)                                                                                                                                                                   | 2 wt%                  | UCST (@ 27.8)                   | 123  |
| <i>i</i> PrOH      | Poly( <i>N</i> -(4-vinylbenzyl)- <i>N,N</i> -diethylamine)                                                                                                                                                    | 2 wt%                  | UCST (@ 24.3)                   | 123  |
| <i>i</i> PrOH      | Poly( <i>N</i> -(4-vinylbenzyl)- <i>N,N</i> -diethylamine)                                                                                                                                                    | 2 wt%                  | UCST (@ 43.5)                   | 112  |

|                                      |                                                                                                                                                           |                        |                              |     |
|--------------------------------------|-----------------------------------------------------------------------------------------------------------------------------------------------------------|------------------------|------------------------------|-----|
| <i>i</i> PrOH                        | Poly(2-(2-methoxyethoxy)ethyl methacrylate- <i>b</i> - <i>N</i> -(4-vinylbenzyl)- <i>N,N</i> -diethylamine)                                               | 2 wt%                  | UCST (@ 23.2)                | 123 |
| <i>i</i> PrOH                        | Poly(2-(2-(2-(2-((tetrahydrofuran-2-yl)oxy)ethoxy)ethoxy)ethoxy)ethyl methacrylate)                                                                       | 1 wt%                  | UCST (~ 35)                  | 106 |
| <i>i</i> PrOH                        | Poly(oligo(ethylene glycol) methyl ether acrylate)                                                                                                        | 10 mg mL <sup>-1</sup> | UCST (@ 11.8)                | 83  |
| <i>i</i> PrOH                        | Poly(oligo(ethylene glycol) phenyl ether acrylate- <i>co</i> -oligo(ethylene glycol) methyl ether acrylate)                                               | 10 mg mL <sup>-1</sup> | UCST (@ 14.9-73.6)           | 83  |
| <i>i</i> PrOH- <i>d</i> <sub>3</sub> | Poly((oligo(ethylene glycol) phenyl ether acrylate- <i>co</i> -oligo(ethylene glycol) methyl ether acrylate)- <i>b</i> - <i>N,N</i> -dimethyl acrylamide) | 20 mg mL <sup>-1</sup> | UCST (@ 45.2)                | 83  |
| <i>i</i> PrOH                        | Poly(oligo(ethylene glycol)acrylamide)<br>M <sub>n</sub> OEG= 750 Da                                                                                      | 5 mg mL <sup>-1</sup>  | UCST (@ 16)                  | 127 |
| <i>i</i> PrOH                        | Poly(oligo(ethylene glycol)acrylamide)<br>M <sub>n</sub> OEG= 5 kDa                                                                                       | 5 mg mL <sup>-1</sup>  | UCST (@ 38.5)                | 127 |
| <i>i</i> PrOH                        | Poly(oligo(ethylene glycol)methacrylamide)<br>M <sub>n</sub> OEG= 350 Da                                                                                  | 5 mg mL <sup>-1</sup>  | UCST (@ 8.1)                 | 127 |
| <i>i</i> PrOH                        | Poly(oligo(ethylene glycol)methacrylamide)<br>M <sub>n</sub> OEG= 750 Da                                                                                  | 5 mg mL <sup>-1</sup>  | UCST (@ 17.4)                | 127 |
| <i>i</i> PrOH                        | Poly(tri(ethylene glycol) methacrylamide)                                                                                                                 | 5 mg mL <sup>-1</sup>  | UCST (@ -3)                  | 127 |
| <i>i</i> PrOH                        | Poly( <i>N</i> -(2-methacryloxyethyl)pyrrolidone]- <i>b</i> -methyl methacrylate)                                                                         | 5 wt%                  | Sol-gel transition (@ 27-50) | 116 |

**Table S5.** Overview of polymers showing a thermoresponsive behaviour in other alcoholic solvents.

| Solvent            | Type of polymer                                                                                                                                                | Polymer conc            | Phase transition type (Temp °C) | Ref. |
|--------------------|----------------------------------------------------------------------------------------------------------------------------------------------------------------|-------------------------|---------------------------------|------|
| BuOH               | Poly(oligo(ethylene glycol) methyl ether methacrylate)                                                                                                         | 16 mg mL <sup>-1</sup>  | UCST (@ 36.6)                   | 82   |
| BuOH               | Poly(oligo(ethylene glycol) methyl ether methacrylate)                                                                                                         | 5 mg mL <sup>-1</sup>   | UCST (@ 5)                      | 115  |
| BuOH               | Poly(oligo(ethylene glycol) methyl ether methacrylate- <i>b</i> - <i>N</i> -isopropylacrylamide)                                                               | 5 mg mL <sup>-1</sup>   | UCST (@ 3)                      | 115  |
| BuOH               | Poly(oligo(ethylene glycol) methyl ether methacrylate- <i>b</i> - <i>N,N</i> -diethylacrylamide)                                                               | 5 mg mL <sup>-1</sup>   | UCST (@ 2.5)                    | 115  |
| BuOH               | Poly(( $\gamma$ -4-oligo(ethylene glycol) benzyl-L-glutamate)- <i>random</i> -( $\gamma$ -benzyl-L-glutamate))                                                 | 0.2 mg mL <sup>-1</sup> | UCST (@ 37.4-84)                | 110  |
| BuOH               | Poly( $\gamma$ -propyl-L-glutamate) tetra-O-acetyl-D-(+)-mannopyranoside conjugate                                                                             | 1 mg mL <sup>-1</sup>   | UCST (@ 69.9)                   | 100  |
| BuOH               | Poly( $\gamma$ -4-(propoxycarbonyl)benzyl-L-glutamate)-oligo(ethylene glycol) derived from azido functionalized triethylene glycol monomethylether             | 1 mg mL <sup>-1</sup>   | UCST (~78)                      | 93   |
| BuOH               | Poly( $\gamma$ -4-(propoxycarbonyl)benzyl-L-glutamate)-oligo(ethylene glycol) derived from azido functionalized poly(ethylene glycol) methylether 350          | 1 mg mL <sup>-1</sup>   | UCST (~60)                      | 93   |
| BuOH               | Poly( $\gamma$ -4-(4-propoxyphenoxycarbonyl)benzyl-L-glutamate)-oligo(ethylene glycol) derived from azido functionalized poly(ethylene glycol) methylether 350 | 1 mg mL <sup>-1</sup>   | UCST (~69)                      | 93   |
| BuOH               | Poly( $\gamma$ -4-(2-(2-methoxyethoxy) ethoxycarbonyl)benzyl- L-glutamate)                                                                                     | 1 mg mL <sup>-1</sup>   | UCST (@ 56.0)                   | 98   |
| BuOH               | Poly( $\gamma$ -4-(2-(2-(2-methoxyethoxy) ethoxy)ethoxycarbonyl) benzyl- L-glutamate)                                                                          | 1 mg mL <sup>-1</sup>   | UCST (@ 42.7)                   | 98   |
| BuOH               | Poly(2-hydroxyethyl methacrylate)                                                                                                                              | 1 wt%                   | UCST (@ 60.8-73.0)              | 111  |
| BuOH               | Poly( <i>N</i> -phenyl maleimide- <i>co</i> - <i>n</i> -octadecyl vinyl ether)                                                                                 | 0.1 wt%                 | UCST (@ 67)                     | 117  |
| <i>i</i> BuOH      | Poly(oligo(ethylene glycol) methyl ether methacrylate)                                                                                                         | 16 mg mL <sup>-1</sup>  | UCST (@ 30.4)                   | 82   |
| <i>i</i> BuOH      | Poly(2-hydroxyethyl methacrylate)                                                                                                                              | 1 wt%                   | UCST (@ 68.8-71.4)              | 111  |
| <i>sec</i> BuOH    | Poly(oligo(ethylene glycol) methyl ether methacrylate)                                                                                                         | 16 mg mL <sup>-1</sup>  | UCST (@26.4)                    | 82   |
| <i>sec</i> BuOH    | Poly(2-hydroxyethyl methacrylate)                                                                                                                              | 1 wt%                   | UCST (@ 13.5-14.0)              | 111  |
| 2-Methyl-1-butanol | Poly(oligo(ethylene glycol) methyl ether methacrylate)                                                                                                         | 16 mg mL <sup>-1</sup>  | UCST (@ 22.2)                   | 82   |
| Glycerol           | Poly(2-hydroxyethyl methacrylate)                                                                                                                              | 1 wt%                   | UCST (@ 71.8-83.6)              | 111  |

|                     |                                                                                                                                                        |                         |                              |     |
|---------------------|--------------------------------------------------------------------------------------------------------------------------------------------------------|-------------------------|------------------------------|-----|
| PeOH                | Poly( $\gamma$ -4-oligo(ethylene glycol) benzyl-L-glutamate)- <i>random</i> -( $\gamma$ -benzyl-L-glutamate))                                          | 0.2 mg mL <sup>-1</sup> | UCST (@ 43.3-86)             | 110 |
| PeOH                | Poly( $\gamma$ -propyl-L-glutamate) tetra-O-acetyl-D-(+)-mannopyranoside conjugate                                                                     | 1 mg mL <sup>-1</sup>   | UCST (@ 77.9)                | 100 |
| PeOH                | Poly( $\gamma$ -4-(propoxycarbonyl)benzyl-L-glutamate)-oligo(ethylene glycol) derived from azido functionalized triethylene glycol monomethylether     | 1 mg mL <sup>-1</sup>   | UCST (~80)                   | 93  |
| PeOH                | Poly( $\gamma$ -4-(propoxycarbonyl)benzyl-L-glutamate)-oligo(ethylene glycol) derived from azido functionalized poly(ethylene glycol) methylether 350  | 1 mg mL <sup>-1</sup>   | UCST (~63)                   | 93  |
| PeOH                | Poly( $\gamma$ -4-(4-propoxyphenoxy)benzyl-L-glutamate)-oligo(ethylene glycol) derived from azido functionalized poly(ethylene glycol) methylether 350 | 1 mg mL <sup>-1</sup>   | UCST (~72)                   | 93  |
| PeOH                | Poly( $\gamma$ -4-(2-(2-methoxyethoxy) ethoxycarbonyl)benzyl-L-glutamate)                                                                              | 1 mg mL <sup>-1</sup>   | UCST (@ 59.8)                | 98  |
| PeOH                | Poly( $\gamma$ -4-(2-(2-(2-methoxyethoxy) ethoxy)ethoxycarbonyl) benzyl-L-glutamate)                                                                   | 1 mg mL <sup>-1</sup>   | UCST (@ 49.8)                | 98  |
| PeOH                | Poly(oligo(ethylene glycol) methyl ether methacrylate)                                                                                                 | 16 mg mL <sup>-1</sup>  | UCST (@ 40.9)                | 82  |
| <i>i</i> PeOH       | Poly(oligo(ethylene glycol) methyl ether methacrylate)                                                                                                 | 16 mg mL <sup>-1</sup>  | UCST (@ 35.7)                | 82  |
| 4-Methyl-2-pentanol | Poly(oligo(ethylene glycol) methyl ether methacrylate)                                                                                                 | 16 mg mL <sup>-1</sup>  | UCST (@ 34.0)                | 82  |
| HexOH               | Poly( <i>N</i> -phenyl maleimide- <i>co</i> - <i>n</i> -octadecyl vinyl ether)                                                                         | 0.1 wt%                 | UCST (~ 47)                  | 117 |
| HexOH               | Poly(oligo(ethylene glycol) methyl ether methacrylate)                                                                                                 | 16 mg mL <sup>-1</sup>  | UCST (@ 46.2)                | 82  |
| HepOH               | Poly(oligo(ethylene glycol) methyl ether methacrylate)                                                                                                 | 16 mg mL <sup>-1</sup>  | UCST (@ 53.3)                | 82  |
| 2-Octanol           | Poly(oligo(ethylene glycol) methyl ether methacrylate)                                                                                                 | 16 mg mL <sup>-1</sup>  | UCST (@ 47.7)                | 82  |
| OctOH               | Poly( <i>N</i> -phenyl maleimide- <i>co</i> - <i>n</i> -octadecyl vinyl ether)                                                                         | 0.1 wt%                 | UCST (~ 35)                  | 117 |
| OctOH               | Poly(oligo(ethylene glycol) methyl ether methacrylate)                                                                                                 | 5 mg mL <sup>-1</sup>   | UCST (@ 23)                  | 115 |
| OctOH               | Poly(oligo(ethylene glycol) methyl ether methacrylate- <i>b</i> - <i>N,N</i> -diethylacrylamide)                                                       | 1 mg mL <sup>-1</sup>   | UCST (@ 25)                  | 128 |
| OctOH               | Poly(oligo(ethylene glycol) methyl ether methacrylate- <i>b</i> - <i>N,N</i> -diethylacrylamide)                                                       | 5 mg mL <sup>-1</sup>   | UCST (@ 25)                  | 115 |
| OctOH               | Poly(oligo(ethylene glycol) methyl ether methacrylate- <i>b</i> - <i>N</i> -isopropylacrylamide)                                                       | 5 mg mL <sup>-1</sup>   | UCST (@ 28)                  | 115 |
| OctOH               | Poly(oligo(ethylene glycol) methyl ether methacrylate- <i>b</i> -( <i>N</i> -isopropylacrylamide- <i>co</i> -pentafluorophenyl acrylate))              | 1 mg mL <sup>-1</sup>   | Self-assembly (@ 0)          | 115 |
| OctOH               | Poly(ethylene glycol) 6 kDa                                                                                                                            | 5 mg mL <sup>-1</sup>   | UCST (@ 49.2)                | 127 |
| OctOH               | Poly(oligo(ethylene glycol)acrylamide)<br>M <sub>n</sub> OEG= 750 Da                                                                                   | 5 mg mL <sup>-1</sup>   | UCST (@ 18.9)                | 127 |
| OctOH               | Poly(oligo(ethylene glycol)acrylamide)<br>M <sub>n</sub> OEG= 5 kDa                                                                                    | 5 mg mL <sup>-1</sup>   | UCST (@ 45.5)                | 127 |
| OctOH               | Poly(tri(ethylene glycol)methacrylamide)                                                                                                               | 5 mg mL <sup>-1</sup>   | UCST (@ 2)                   | 127 |
| OctOH               | Poly(oligo(ethylene glycol)methacrylamide)<br>M <sub>n</sub> OEG= 350 Da                                                                               | 5 mg mL <sup>-1</sup>   | UCST (@ 8.8)                 | 127 |
| OctOH               | Poly(oligo(ethylene glycol)methacrylamide)<br>M <sub>n</sub> OEG= 750 Da                                                                               | 5 mg mL <sup>-1</sup>   | UCST (@ 18.6)                | 127 |
| Dodecanol           | Poly(oligo(ethylene glycol) methyl ether methacrylate)                                                                                                 | 16 mg mL <sup>-1</sup>  | UCST (@ 75.4)                | 82  |
| CyclohexOH          | Polystyrene                                                                                                                                            | ~ 1-20 wt%              | UCST (~ 28-80)               | 118 |
| CyclohexOH          | Poly(methyl methacrylate)                                                                                                                              | ~ 0.2-13 wt%            | UCST (~ 70-80)               | 118 |
| CyclohexOH          | Poly(styrene- <i>b</i> -methyl methacrylate)                                                                                                           | ~ 0.15-20 wt%           | UCST (~ 65-75)               | 118 |
| BnOH                | Poly( $\gamma$ -benzyl L-glutamate)                                                                                                                    | 15-40 wt%               | Sol-gel transition (@ 60-70) | 119 |

**Table S6.** Overview of thermoresponsive polymers in aliphatic hydrocarbons, aromatic hydrocarbons, and oils.

| Solvent | Type of polymer | Polymer conc | Phase transition type (Temp °C) | Ref |
|---------|-----------------|--------------|---------------------------------|-----|
|---------|-----------------|--------------|---------------------------------|-----|

|                                                                  |                                                                                                                            |                              |                                                                        |     |
|------------------------------------------------------------------|----------------------------------------------------------------------------------------------------------------------------|------------------------------|------------------------------------------------------------------------|-----|
| Hexane/achiral benzyl amine                                      | Substituted chiral poly(phenylacetylene)                                                                                   | 1 mmol L <sup>-1</sup>       | Conformational transition (@3)                                         | 129 |
| Hexane/achiral benzyl amine                                      | Substituted chiral/achiral copoly(phenylacetylene)                                                                         | 1 mmol L <sup>-1</sup>       | Conformational transition (@16)                                        | 129 |
| Hexane                                                           | Poly(octadecyl vinyl ether)                                                                                                | 1 wt%                        | UCST (@ 9)                                                             | 147 |
| Hexane                                                           | Poly(octadecyl vinyl ether)                                                                                                | 1 wt%                        | UCST (~ 9)                                                             | 109 |
| Methylcyclohexane                                                | Polystyrene                                                                                                                | 1-25 wt%                     | LCST (~ 215-250)<br>UCST (~ 35-70)                                     | 130 |
| Cyclohexane                                                      | Polystyrene                                                                                                                | 1-25 wt%                     | LCST (~ 215-240)<br>UCST (~ 10-30)                                     | 130 |
| Cyclohexane                                                      | Polystyrene                                                                                                                | 0.005-0.4 wt%                | UCST (~ 3.1-28.3)                                                      | 21  |
| Cyclohexane                                                      | Poly(styrene)                                                                                                              | 5 mg mL <sup>-1</sup>        | ND                                                                     | 148 |
| Cyclohexane                                                      | Star poly(styrene)                                                                                                         | 5 mg mL <sup>-1</sup>        | ND                                                                     | 148 |
| Heptane                                                          | Polystyrene- <i>b</i> -polyisoprene                                                                                        | 0.001-10 mg mL <sup>-1</sup> | Cylinders-to-spheres (~35) and vesicles-to-cylinders transition (~ 40) | 131 |
| <i>n</i> -Octane                                                 | Poly(stearyl methacrylate- <i>b</i> -3-phenylpropyl methacrylate)                                                          | 20-30 wt%                    | Worm-to-sphere transition (~ 70)                                       | 132 |
| Decane                                                           | Poly(octadecyl vinyl ether)- <i>b</i> -poly(isobutyl vinyl ether)ODVE and IBVE                                             | 20 wt%                       | Sol-gel transition (~ 17)                                              | 109 |
| Decane                                                           | Poly( <i>tert</i> -octyl acrylamide- <i>b</i> - <i>N,N</i> -dimethylacrylamide)                                            | 1.0 wt%                      | UCST (@ 2)                                                             | 137 |
| Propyl acetate / <i>n</i> -alkanes                               | Poly(2-chloroethyl vinyl ether- <i>alt</i> -maleic anhydride)                                                              | 0.1 wt%                      | LCST (~ 37- 52)                                                        | 149 |
| Propyl acetate/ <i>n</i> -alkanes                                | Poly(2-chloroethyl vinyl ether- <i>alt</i> -maleic anhydride)                                                              | 1 wt%                        | LCST (@ 45.2-49.2)                                                     | 150 |
| <i>n</i> -Dodecane                                               | Poly(benzyl methacrylate- <i>b</i> -lauryl methacrylate)                                                                   | 5-20 wt%                     | Worm-to-sphere transition (~ 50)                                       | 133 |
| <i>n</i> -Dodecane                                               | Graft-copolymers with polyolefin backbones and poly(butyl methacrylate- <i>stat</i> -lauryl methacrylate) side chains      | 2 mg mL <sup>-1</sup>        | UCST (~ 80)                                                            | 134 |
| <i>n</i> -Dodecane                                               | Poly(lauryl acrylate- <i>b</i> -benzyl acrylate)                                                                           | 15 wt%                       | Worm-to-sphere transition (~ 15)                                       | 135 |
| <i>n</i> -Dodecane                                               | Poly( <i>tert</i> -octyl acrylamide- <i>b</i> - <i>N,N</i> -dimethylacrylamide)                                            | 1.0 wt%                      | UCST (@ 27)                                                            | 137 |
| <i>n</i> -Dodecane                                               | Poly( $\epsilon$ -allyl- $\epsilon$ -caprolactone) functionalized with alkyl thiols                                        | 1-100 mg mL <sup>-1</sup>    | UCST (~ 40-50)                                                         | 151 |
| <i>n</i> -Dodecane/aqueous 0.3M NaNO <sub>3</sub> solution (1:1) | Azobenzene randomly modified poly(sodium acrylate) + tetraethylene glycol monododecyl ether (surfactant)                   | 6 mg mL <sup>-1</sup>        | Increase (@ 18) and decrease (@ 26.7) of foamability                   | 152 |
| <i>n</i> -Tetradecane                                            | Poly(stearyl methacrylate- <i>b</i> -3-phenylpropyl methacrylate)                                                          | 20 wt%                       | Worm-to-sphere transition (~ 85)                                       | 136 |
| <i>n</i> -Tetradecane                                            | Poly( <i>tert</i> -octyl acrylamide- <i>b</i> - <i>N,N</i> -dimethylacrylamide)                                            | 1.0 wt%                      | UCST (@ 35)                                                            | 137 |
| <i>n</i> -Hexadecane                                             | Poly( <i>tert</i> -octyl acrylamide- <i>b</i> - <i>N,N</i> -dimethylacrylamide)                                            | 1.0 wt%                      | UCST (@ 55)                                                            | 137 |
| <i>Iso</i> hexadecane                                            | Poly(lauryl acrylate- <i>b</i> -benzyl acrylate)                                                                           | 15 wt%                       | Worm-to-sphere transition (~ 67)                                       | 135 |
| Toluene                                                          | Poly(octadecyl vinyl ether)                                                                                                | 1 wt%                        | UCST (~ 4)                                                             | 109 |
| Toluene                                                          | Poly(2-(4-biphenyloxy)ethyl vinyl ether)                                                                                   | 1 wt%                        | UCST (~ 12)                                                            | 109 |
| Toluene                                                          | Poly[2-(4,4,5,5,6,6,7,7,7-nonafluoroheptyloxy)ethyl vinyl ether]                                                           | 1 wt%                        | UCST (@ 69)                                                            | 153 |
| Toluene                                                          | Poly(3-((4R,5R)-4,5-bis(hydroxydiphenylmethyl)-2-methyl-1,3-dioxolane-2-yl)propyl acrylate) + chiral effectors             | 10 mg mL <sup>-1</sup>       | UCST or sol-gel transition (ND)                                        | 138 |
| Toluene                                                          | Poly(3-((4R,5R)-4,5-bis(hydroxydiphenylmethyl)-2-methyl-1,3-dioxolane-2-yl)propyl acrylate)+ (S) or (R)-2-methylpiperidine | 25 mg mL <sup>-1</sup>       | UCST (~10-30)-<br>LCST (~20-60)-<br>UCST (~45-75)                      | 138 |
| Toluene                                                          | Poly(vinyl phenol- <i>alt</i> - <i>N</i> -dodecyl maleimide)                                                               | 1 wt%                        | UCST (~ 60)                                                            | 139 |
| Toluene                                                          | Poly(vinyl phenol- <i>alt</i> - <i>N</i> -octadecyl maleimide)                                                             | 1 wt%                        | Sol-gel transition (~ RT)                                              | 139 |

|                                                          |                                                                                                                                                                                                                                                   |                        |                                    |     |
|----------------------------------------------------------|---------------------------------------------------------------------------------------------------------------------------------------------------------------------------------------------------------------------------------------------------|------------------------|------------------------------------|-----|
| Toluene                                                  | Poly(vinyl phenol- <i>alt</i> - <i>N</i> -dodecyl maleimide)                                                                                                                                                                                      | 5 wt%                  | Sol-gel transition (~ RT)          | 139 |
| Toluene                                                  | Poly(vinyl phenol- <i>alt</i> - <i>N</i> -octadecyl maleimide)                                                                                                                                                                                    | 5 wt%                  | Sol-gel transition (~ RT)          | 139 |
| Toluene                                                  | Poly(11-(4-(( <i>E</i> )-4-butylstyryl)phenoxy)undecyl methacrylate)                                                                                                                                                                              | 2 wt%                  | UCST (@ 26.3)                      | 140 |
| Toluene                                                  | Poly( $\gamma$ -benzyl-L-glutamate)                                                                                                                                                                                                               | 0.2-2 wt%              | Sol-gel transition (~ 48-53)       | 154 |
| Toluene/BuOH                                             | Poly[2-(vinylxy)-ethyl-1-butylimidazolium chloride]                                                                                                                                                                                               | 1 wt%                  | LCST (~ 60)                        | 155 |
| Toluene/2-amino-1-butanol                                | Substituted chiral poly(phenylacetylene)                                                                                                                                                                                                          | 1 mmol L <sup>-1</sup> | Conformational transition (ND)     | 129 |
| Toluene/DMSO                                             | Substituted chiral poly(phenylacetylene)                                                                                                                                                                                                          | 1 mmol L <sup>-1</sup> | Conformational transition (ND)     | 129 |
| 1,2,4-Triethylbenzene                                    | Poly(11-(4-(( <i>E</i> )-4-butylstyryl)phenoxy)undecyl methacrylate)                                                                                                                                                                              | 2 wt%                  | UCST (@ 49.7)                      | 140 |
| Diocetyl phthalate, dibutyl phthalate, diethyl phthalate | Poly(styrene- <i>b</i> -dimethylsiloxane)                                                                                                                                                                                                         | 1 wt%                  | Thermotropic transition (@ 70)     | 141 |
| Hydrocarbon oil                                          | Poly(lauryl methacrylate- <i>b</i> -styrene- <i>b</i> -lauryl methacrylate)                                                                                                                                                                       | 0.1-16 wt%             | Swelling of micelles (~ 80)        | 142 |
| Mineral oil                                              | Poly(stearyl methacrylate- <i>b</i> -benzyl methacrylate)                                                                                                                                                                                         | 10 wt%                 | Vesicle-to-worm transition (@ 135) | 143 |
| Polyalphaolefin                                          | Poly(alkyl methacrylate)s with different alkyl side chain lengths                                                                                                                                                                                 | 1 wt%                  | UCST (0.5-138)                     | 144 |
| Polyalphaolefin                                          | Poly( <i>n</i> -butyl methacrylate- <i>co</i> - <i>n</i> -hexyl methacrylate)- <i>b</i> -poly(2-ethylhexyl methacrylate- <i>co</i> -lauryl methacrylate)- <i>b</i> -poly( <i>n</i> -butyl methacrylate- <i>co</i> - <i>n</i> -hexyl methacrylate) | 14.3-15 wt%            | Sol-gel transition (~ 0-63.5)      | 144 |
| Decamethylcyclopentasiloxane silicone oil                | Poly(dimethylsiloxane- <i>b</i> -2-(dimethylamino) ethyl methacrylate)                                                                                                                                                                            | 0.25-25 wt%            | Worm-to-sphere transition (@ 32)   | 145 |
| Yubase-4 oil                                             | Poly(2-stearyl-2-oxazoline- <i>co</i> -2-ethyl-2-oxazoline)                                                                                                                                                                                       | 5 mg mL <sup>-1</sup>  | UCST (~80-49)                      | 146 |
| Yubase-4 oil                                             | Poly(methacrylic acid- <i>co</i> -2-ethylhexyl methacrylate)- <i>graft</i> -poly(2-stearyl-2-oxazoline- <i>co</i> -2-ethyl-2-oxazoline)                                                                                                           | 5 mg mL <sup>-1</sup>  | UCST (~40-51)                      | 146 |

**Table S7.** Overview of thermoresponsive polymers in halogenated solvents.

| Solvent                      | Type of polymer                                                                                                   | Polymer conc               | Phase transition type (Temp °C)          | Ref |
|------------------------------|-------------------------------------------------------------------------------------------------------------------|----------------------------|------------------------------------------|-----|
| CHCl <sub>3</sub>            | Poly(octadecyl vinyl ether)                                                                                       | 1 wt%                      | UCST (ND)                                | 147 |
| CHCl <sub>3</sub>            | Poly(octadecyl vinyl ether)                                                                                       | 1 wt%                      | UCST (~ -2)                              | 109 |
| CHCl <sub>3</sub>            | Poly[2-(vinylxy)-ethyl-1-butylimidazolium chloride]                                                               | 2 wt%                      | LCST (@30)                               | 155 |
| CHCl <sub>3</sub> /MeOH      | Poly[2-(vinylxy)ethyl-4-methylpyridinium chloride]                                                                | 1 wt%                      | LCST (~35)                               | 155 |
| CHCl <sub>3</sub>            | Poly[2-(4,4,5,5,6,6,7,7,7-nonafluoroheptyloxy)ethyl vinyl ether]                                                  | 1 wt%                      | UCST (~20)                               | 153 |
| CHCl <sub>3</sub>            | Poly(isobutyl vinyl ether)- <i>b</i> -(2-(4,4,5,5,6,6,7,7,7-nonafluoroheptyloxy)ethyl vinyl ether)                | 0.5 wt%                    | Self-assembly (~25)                      | 153 |
| CHCl <sub>3</sub>            | Poly(isobutyl vinyl ether)- <i>b</i> -(2-(4,4,5,5,6,6,7,7,7-nonafluoroheptyloxy)ethyl vinyl ether)                | 20 wt%                     | Sol-gel transition (~25)                 | 153 |
| CHCl <sub>3</sub> (+ 2%EtOH) | Chiral-polymeric ionic liquids (CPILs) with benzyl <i>N</i> -substituent and an imidazole derived from (L)-valine | 0.5 mg mL <sup>-1</sup>    | LCST (@48.5)                             | 156 |
| CHCl <sub>3</sub>            | CPIL-stabilized AuNPs                                                                                             | 1 mg mL <sup>-1</sup>      | LCST (@ 31)                              | 156 |
| CHCl <sub>3</sub>            | Poly(7-methacryloyloxycoumarin)                                                                                   | 0.1 wt%                    | LCST (@28)                               | 157 |
| CHCl <sub>3</sub>            | Poly(arylene ether sulfone)                                                                                       | 20 mg mL <sup>-1</sup>     | LCST (@59)                               | 163 |
| CHCl <sub>3</sub>            | Poly(3-((4 <i>R</i> ,5 <i>R</i> )-4,5-bis(hydroxydiphenylmethyl)-2-methyl-1,3-dioxolane-2-yl)propyl acrylate)     | 10 mg mL <sup>-1</sup>     | UCST (~50)                               | 138 |
| CHCl <sub>3</sub>            | Poly((-)-3-methoxycarbonyl-5-( <i>N</i> -methyl- <i>N</i> -( <i>S</i> )-(1-phenylethyl)carbonyl)phenylacetylene)  | 0.0001 mol L <sup>-1</sup> | <i>Cis-trans</i> isomerization (~ 15-20) | 158 |
| DCM                          | Poly(octadecyl vinyl ether)                                                                                       | 1 wt%                      | UCST (ND)                                | 147 |



|                              |                                                                                                                                                              |                        |                                 |     |
|------------------------------|--------------------------------------------------------------------------------------------------------------------------------------------------------------|------------------------|---------------------------------|-----|
| DCM                          | Poly(octadecyl vinyl ether)                                                                                                                                  | 1 wt%                  | UCST (@14)                      | 109 |
| DCM                          | Poly(hexadecyl vinyl ether)                                                                                                                                  | 1 wt%                  | UCST (ND)                       | 109 |
| DCM                          | Poly(7-methacryloyloxy coumarin)                                                                                                                             | 0.3wt%                 | LCST (~39)                      | 157 |
| DCM                          | Poly(3-((4R,5R)-4,5-bis(hydroxydiphenylmethyl)-2-methyl-1,3-dioxolane-2-yl)propyl acrylate)                                                                  | 10 mg mL <sup>-1</sup> | UCST (~43)                      | 138 |
| DCE                          | Poly(2-(3-Butylureido)propyl acrylate) + effectors                                                                                                           | 25 mg mL <sup>-1</sup> | LCST (@43-57) and UCST (@32-71) | 159 |
| DCE                          | Poly(3-(3-butylureido)propyl acrylate-stat- <i>N</i> -[3-(acryloyloxy)propyl]- <i>N,N,N</i> -triethylammonium tetrakis(3,5-bis(trifluoromethyl)phenyl)borate | 25 mg mL <sup>-1</sup> | UCST (@65)                      | 164 |
| DCE                          | Poly(3-(3-butylureido)propyl acrylate) (PUA) + effector                                                                                                      | 25 mg mL <sup>-1</sup> | LCST (~ 33) and UCST (~38)      | 160 |
| DCE                          | Poly(3-(3-butylureido)propyl methacrylate) (PUMA) + effector                                                                                                 | 25 mg mL <sup>-1</sup> | LCST (~30) and UCST (~24)       | 160 |
| DCE                          | Poly(3-(3-butylureido)propyl vinyl ether) (PUVE) + effector                                                                                                  | 25 mg mL <sup>-1</sup> | LCST (~47) and UCST (~20)       | 160 |
| DCE                          | Poly((1-pyrene)methyl acrylate) + effectors                                                                                                                  | 10 mg mL <sup>-1</sup> | LCST (@43)                      | 161 |
| DCE                          | Poly(3-((4R,5R)-4,5-bis(hydroxydiphenylmethyl)-2-methyl-1,3-dioxolane-2-yl)propyl acrylate)                                                                  | 10 mg mL <sup>-1</sup> | UCST (~50)                      | 138 |
| 1,1,2-Trichloroethane        | Poly(7-methacryloyloxy coumarin)                                                                                                                             | 0.3wt%                 | LCST (ND)                       | 157 |
| <i>o</i> -Dichlorobenzene    | Poly[(5,6-difluoro-2,1,3-benzothiadiazol-4,7-diyl)-alt-(3,3''-di(2-octyl-dodecyl)-2,2',5',2''-quaterthiophen-5,5'''-diyl)]                                   | 5 mg mL <sup>-1</sup>  | Disaggregation (~ 75)           | 162 |
| <i>o</i> -Dichlorobenzene    | Poly[(5,6-difluoro-2,1,3-benzothiadiazol-4,7-diyl)-alt-(3,3''-di(2-nonyltridecyl)-2,2',5',2''-quaterthiophen-5,5'''-diyl)]                                   | 5 mg mL <sup>-1</sup>  | Disaggregation (~ 75)           | 162 |
| Perfluoro(methylcyclohexane) | Poly[2-(4,4,5,5,6,6,7,7,7-nonafluoroheptyloxy)ethyl vinyl ether]                                                                                             | 1 wt%                  | UCST (~10)                      | 153 |
| Perfluorodecalin             | Poly[2-(4,4,5,5,6,6,7,7,7-nonafluoroheptyloxy)ethyl vinyl ether]                                                                                             | 1 wt%                  | UCST (~20)                      | 153 |

**Table S8.** Overview of thermoresponsive polymers in ionic liquids

| Solvent                                 | Type of polymer                                                                                                               | Polymer conc | Phase transition type (Temp °C)                | Ref |
|-----------------------------------------|-------------------------------------------------------------------------------------------------------------------------------|--------------|------------------------------------------------|-----|
| [C <sub>2</sub> mim][NTf <sub>2</sub> ] | Poly(benzyl methacrylate)                                                                                                     | 3 wt%        | LCST (@ 105)                                   | 166 |
| [C <sub>2</sub> mim][NTf <sub>2</sub> ] | Poly(benzyl methacrylate)                                                                                                     | 3 wt%        | LCST (@ 105)                                   | 165 |
| [C <sub>2</sub> mim][NTf <sub>2</sub> ] | Poly(benzyl methacrylate- <i>co</i> -styrene)                                                                                 | 3 wt%        | LCST (~ 70-100)                                | 166 |
| [C <sub>2</sub> mim][NTf <sub>2</sub> ] | Poly(benzyl methacrylate- <i>co</i> -methyl methacrylate)                                                                     | 3 wt%        | LCST (~ 120-140)                               | 166 |
| [C <sub>2</sub> mim][NTf <sub>2</sub> ] | Poly(methyl methacrylate)- <i>b</i> -poly(benzyl methacrylate)                                                                | 2 wt%        | LCST and LCMT (~ 120)                          | 167 |
| [C <sub>2</sub> mim][NTf <sub>2</sub> ] | Poly(styrene- <i>co</i> -methyl methacrylate)                                                                                 | 3 wt%        | LCST (~ 85-170)<br>UCST (~ -5-10)<br>LCST+UCST | 168 |
| [C <sub>2</sub> mim][NTf <sub>2</sub> ] | Poly( <i>cis</i> -4-phenylazophenyl methacrylate- <i>co</i> - benzyl methacrylate)                                            | 3 wt%        | LCST (~ 102-103)                               | 169 |
| [C <sub>2</sub> mim][NTf <sub>2</sub> ] | Poly( <i>trans</i> -4-phenylazophenyl methacrylate- <i>co</i> - benzyl methacrylate)                                          | 3 wt%        | LCST (~ 80-83)                                 | 169 |
| [C <sub>2</sub> mim][NTf <sub>2</sub> ] | Poly(benzyl methacrylate- <i>co</i> -9-(4-vinylbenzyl)-9H-carbazole)                                                          | 3 wt%        | LCST (@ 68-86)                                 | 183 |
| [C <sub>2</sub> mim][NTf <sub>2</sub> ] | Poly(benzyl methacrylate- <i>co</i> -9-(4-vinylbenzyl)-9H-carbazole)- <i>b</i> -poly(methyl methacrylate- <i>co</i> -styrene) | 3 wt%        | LCST (@ 97)                                    | 183 |
| [C <sub>2</sub> mim][NTf <sub>2</sub> ] | Poly(benzyl methacrylate)-derivatives                                                                                         | 3 wt%        | LCST (@ 42-87)                                 | 175 |
| [C <sub>2</sub> mim][NTf <sub>2</sub> ] | Poly(benzyl methacrylate)- <i>b</i> -poly(methyl methacrylate)- <i>b</i> -poly(benzyl methacrylate)                           | 0.1 wt%      | LCMT (@ 134.5)                                 | 186 |
| [C <sub>2</sub> mim][NTf <sub>2</sub> ] | Poly(benzyl methacrylate)- <i>b</i> -poly(methyl methacrylate)- <i>b</i> -poly(benzyl methacrylate)                           | 20 wt%       | Sol-gel (~ 100)                                | 186 |

|                                                                                 |                                                                                                                                                                        |          |                                    |     |
|---------------------------------------------------------------------------------|------------------------------------------------------------------------------------------------------------------------------------------------------------------------|----------|------------------------------------|-----|
| [C <sub>2</sub> mim][NTf <sub>2</sub> ]                                         | Poly(benzyl methacrylate)- <i>b</i> -poly(methyl methacrylate)- <i>b</i> -poly(2-phenylethyl methacrylate)                                                             | 0.1 wt%  | LCMT (@ 70)                        | 187 |
| [C <sub>2</sub> mim][NTf <sub>2</sub> ]                                         | Poly(benzyl methacrylate)- <i>b</i> -poly(methyl methacrylate)- <i>b</i> -poly(2-phenylethyl methacrylate)                                                             | 20 wt%   | Sol-jamming micelle-gel (~ 40-100) | 187 |
| [C <sub>2</sub> mim][NTf <sub>2</sub> ]                                         | Poly( <i>N</i> -isopropylacrylamide)                                                                                                                                   | 1 wt%    | UCST (@ 34)                        | 170 |
| [C <sub>2</sub> mim][NTf <sub>2</sub> ]                                         | Poly(benzyl methacrylate)- <i>b</i> -poly( <i>N</i> -isopropylacrylamide)                                                                                              | 1 wt%    | LCMT (~ 140)                       | 171 |
| [C <sub>2</sub> mim][NTf <sub>2</sub> ]                                         | Poly(acrylamide)                                                                                                                                                       | 3 wt%    | UCST (~ 150)                       | 171 |
| [C <sub>2</sub> mim][NTf <sub>2</sub> ]                                         | Poly(benzyl methacrylate)- <i>b</i> -poly( <i>N</i> -isopropylacrylamide- <i>r</i> -acrylamide)                                                                        | 1 wt%    | UCMT (~ 40)<br>LCMT (~ 160)        | 171 |
| [C <sub>2</sub> mim][NTf <sub>2</sub> ]                                         | Poly(4-phenylazophenyl methacrylate- <i>r</i> - <i>N</i> -isopropylacrylamide)                                                                                         | 3 wt%    | UCST (@ 7.9-50.9)                  | 189 |
| [C <sub>2</sub> mim][NTf <sub>2</sub> ]                                         | Poly(styrene)- <i>b</i> -poly( <i>N,N</i> -dimethylacrylamide)- <i>b</i> -poly(4-phenylazophenyl methacrylate- <i>r</i> - <i>N</i> -isopropylacrylamide)               | 1 wt%    | UCST (~ 40)                        | 190 |
| [C <sub>2</sub> mim][NTf <sub>2</sub> ]                                         | Poly(styrene)- <i>b</i> -poly( <i>N,N</i> -dimethylacrylamide)- <i>b</i> -poly(4-phenylazophenyl methacrylate- <i>r</i> - <i>N</i> -isopropylacrylamide)               | 15 wt%   | Sol-gel (~ 85)                     | 190 |
| [C <sub>2</sub> mim][NTf <sub>2</sub> ]                                         | Poly( <i>N</i> -isopropylacrylamide)- <i>b</i> -poly(ethylene oxide)- <i>b</i> -poly( <i>N</i> -isopropylacrylamide)                                                   | 10 wt%   | Sol-gel (~ 20)                     | 172 |
| [C <sub>2</sub> mim][NTf <sub>2</sub> ]                                         | Poly( <i>N</i> -isopropylacrylamide)- <i>b</i> -poly(styrene)- <i>b</i> -poly(ethylene oxide)- <i>b</i> -poly(styrene)- <i>b</i> -poly( <i>N</i> -isopropylacrylamide) | 10 wt%   | Sol-gel (~ 39)                     | 192 |
| [C <sub>2</sub> mim][NTf <sub>2</sub> ]                                         | Poly(ethyl glycidyl ether)                                                                                                                                             | 10 wt%   | LCST (@ 84.4)                      | 173 |
| [C <sub>2</sub> mim][NTf <sub>2</sub> ]                                         | Poly(ethyl glycidyl ether)                                                                                                                                             | 10 wt%   | LCST (~ 80)                        | 195 |
| [C <sub>2</sub> mim][NTf <sub>2</sub> ]/[C <sub>4</sub> mim][NTf <sub>2</sub> ] | Poly(2-phenylethyl methacrylate)- <i>b</i> -poly(methyl methacrylate)- <i>b</i> -poly(2-phenylethyl methacrylate)                                                      | 0.1 wt%  | LCMT (@ 60-100)                    | 188 |
| [C <sub>2</sub> mim][NTf <sub>2</sub> ]/[C <sub>4</sub> mim][NTf <sub>2</sub> ] | Poly(2-phenylethyl methacrylate)- <i>b</i> -poly(methyl methacrylate)- <i>b</i> -poly(2-phenylethyl methacrylate)                                                      | 20 wt%   | Sol-gel (@ 25-65)                  | 188 |
| [C <sub>2</sub> mim][NTf <sub>2</sub> ]/[C <sub>4</sub> mim][NTf <sub>2</sub> ] | Poly( <i>n</i> -butyl methacrylate) 48 kDa                                                                                                                             | 2 wt%    | LCST (@ 108-RT)                    | 174 |
| [C <sub>2</sub> mim][NTf <sub>2</sub> ]/[C <sub>4</sub> mim][NTf <sub>2</sub> ] | Poly( <i>n</i> -butyl methacrylate)- <i>b</i> -poly(ethylene oxide)                                                                                                    | 1 wt%    | LCMT (~ 35-125)                    | 174 |
| [C <sub>2</sub> mim][NTf <sub>2</sub> ]/[C <sub>6</sub> mim][NTf <sub>2</sub> ] | Poly( <i>n</i> -butyl methacrylate) 48 kDa                                                                                                                             | 2 wt%    | LCST (@ 108-247)                   | 174 |
| [C <sub>2</sub> mim][NTf <sub>2</sub> ]/[C <sub>4</sub> mim]PF <sub>6</sub>     | Poly(benzyl methacrylate)- <i>b</i> -poly( <i>N</i> -isopropylacrylamide)                                                                                              | 1 wt%    | UCMT (~ 30)<br>LCMT (~ 130)        | 171 |
| [C <sub>4</sub> mim][NTf <sub>2</sub> ]                                         | Poly( <i>n</i> -butyl methacrylate) 48 kDa                                                                                                                             | 0.25 wt% | LCST (@ 119)                       | 174 |
| [C <sub>4</sub> mim][NTf <sub>2</sub> ]                                         | Poly(ethyl glycidyl ether)                                                                                                                                             | 10 wt%   | LCST (@ 167.4)                     | 173 |
| [C <sub>4</sub> mim][NTf <sub>2</sub> ]                                         | Poly(propylene oxide)                                                                                                                                                  | 10 wt%   | LCST (@ 48.0)                      | 173 |
| [C <sub>8</sub> mim][NTf <sub>2</sub> ]                                         | Poly(3-methylbenzyl methacrylate)                                                                                                                                      | 3 wt%    | LCST (@ 162)                       | 175 |
| [C <sub>8</sub> mim][NTf <sub>2</sub> ]                                         | Poly(4-phenylbutyl methacrylate)                                                                                                                                       | 3 wt%    | LCST (@ 242)                       | 175 |
| [C <sub>4</sub> dmim][NTf <sub>2</sub> ]                                        | Poly(benzyl methacrylate)                                                                                                                                              | 3 wt%    | LCST (@ 176)                       | 175 |
| [C <sub>4</sub> dmim][NTf <sub>2</sub> ]                                        | Poly(2-phenylethyl methacrylate)                                                                                                                                       | 3 wt%    | LCST (@ 136)                       | 175 |
| [C <sub>4</sub> dmim][NTf <sub>2</sub> ]                                        | Poly(ethyl glycidyl ether)                                                                                                                                             | 10 wt%   | LCST (@ 23.2)                      | 173 |
| [Azo][NTf <sub>2</sub> ]/[C <sub>1</sub> mim][NTf <sub>2</sub> ]                | Poly(2-phenylethyl methacrylate)                                                                                                                                       | 7 wt%    | LCST (@ 38-125)                    | 184 |
| [Azo][NTf <sub>2</sub> ]/[C <sub>1</sub> mim][NTf <sub>2</sub> ]                | Poly(benzyl methacrylate)                                                                                                                                              | 7 wt%    | LCST (@ 113-174)                   | 184 |
| [Azo][NTf <sub>2</sub> ]/[C <sub>1</sub> mim][NTf <sub>2</sub> ]                | Poly(benzyl methacrylate)- <i>b</i> -poly(methyl methacrylate)- <i>b</i> -poly(benzyl methacrylate)                                                                    | 0.1 wt%  | LCMT (@ 55/65)                     | 185 |
| [Azo][NTf <sub>2</sub> ]/[C <sub>1</sub> mim][NTf <sub>2</sub> ]                | Poly(2-phenylethyl methacrylate)- <i>b</i> -poly(methyl methacrylate)- <i>b</i> -poly(2-phenylethyl methacrylate)                                                      | 0.1 wt%  | LCMT (@ 110/120)                   | 185 |
| [C <sub>1</sub> mim][NTf <sub>2</sub> ]                                         | Poly(2-phenylethyl methacrylate)- <i>b</i> -poly(methyl methacrylate)- <i>b</i> -poly(2-phenylethyl methacrylate)                                                      | 30 wt%   | Sol-gel (@ 23)                     | 176 |
| [Azo][NTf <sub>2</sub> ]/[C <sub>1</sub> mim][NTf <sub>2</sub> ]                | Poly(2-phenylethyl methacrylate)- <i>b</i> -poly(methyl methacrylate)- <i>b</i> -poly(2-phenylethyl methacrylate)                                                      | 30 wt%   | Sol-gel (@ 50.7-61.3)              | 176 |

|                                         |                                                                                                                                                                                                                                        |        |                             |     |
|-----------------------------------------|----------------------------------------------------------------------------------------------------------------------------------------------------------------------------------------------------------------------------------------|--------|-----------------------------|-----|
| [C <sub>2</sub> mim][BF <sub>4</sub> ]  | Poly(ethylene oxide) 20 kDa                                                                                                                                                                                                            | 2 wt%  | LCST (@ 163)                | 191 |
| [C <sub>2</sub> mim][BF <sub>4</sub> ]  | Poly(ethylene oxide) 2 kDa                                                                                                                                                                                                             | 60 wt% | LCST (~ 155)                | 178 |
| [C <sub>2</sub> mim][BF <sub>4</sub> ]  | Poly( <i>N</i> -isopropylacrylamide) 40 kDa                                                                                                                                                                                            | 1 wt%  | UCST (@ 222)                | 177 |
| [C <sub>4</sub> mim][BF <sub>4</sub> ]  | Poly(ethylene oxide) 20 kDa                                                                                                                                                                                                            | 2 wt%  | LCST (@ 209)                | 191 |
| [C <sub>4</sub> mim][BF <sub>4</sub> ]  | Poly( <i>N</i> -isopropylacrylamide)                                                                                                                                                                                                   | 1 wt%  | UCST (@ 67)                 | 177 |
| [C <sub>4</sub> mim][BF <sub>4</sub> ]  | Poly(ethylene oxide)- <i>b</i> -poly( <i>N</i> -isopropylacrylamide)                                                                                                                                                                   | 1 wt%  | UCMT (~ 60)<br>LCMT (~ 207) | 177 |
| [C <sub>2</sub> dmim][BF <sub>4</sub> ] | Poly(ethylene oxide) 2 kDa                                                                                                                                                                                                             | 60 wt% | LCST (~ 110)                | 178 |
| [C <sub>4</sub> mim][PF <sub>6</sub> ]  | Poly( <i>trans</i> -4-phenylazophenyl methacrylate- <i>r</i> - <i>N</i> -isopropylacrylamide)- <i>b</i> -poly(ethylene oxide)- <i>b</i> -poly( <i>trans</i> -4-phenylazophenyl methacrylate- <i>r</i> - <i>N</i> -isopropylacrylamide) | 1 wt%  | UCMT (@ 60)                 | 179 |
| [C <sub>4</sub> mim][PF <sub>6</sub> ]  | Poly( <i>trans</i> -4-phenylazophenyl methacrylate- <i>r</i> - <i>N</i> -isopropylacrylamide)- <i>b</i> -poly(ethylene oxide)- <i>b</i> -poly( <i>trans</i> -4-phenylazophenyl methacrylate- <i>r</i> - <i>N</i> -isopropylacrylamide) | 10 wt% | Sol-gel (@ 56)              | 179 |
| [C <sub>4</sub> mim][PF <sub>6</sub> ]  | Poly( <i>cis</i> -4-phenylazophenyl methacrylate- <i>r</i> - <i>N</i> -isopropylacrylamide)- <i>b</i> -poly(ethylene oxide)- <i>b</i> -poly( <i>cis</i> -4-phenylazophenyl methacrylate- <i>r</i> - <i>N</i> -isopropylacrylamide)     | 1 wt%  | UCMT (@ 44)                 | 179 |
| [C <sub>4</sub> mim][PF <sub>6</sub> ]  | Poly( <i>cis</i> -4-phenylazophenyl methacrylate- <i>r</i> - <i>N</i> -isopropylacrylamide)- <i>b</i> -poly(ethylene oxide)- <i>b</i> -poly( <i>cis</i> -4-phenylazophenyl methacrylate- <i>r</i> - <i>N</i> -isopropylacrylamide)     | 10 wt% | Sol-gel (@ 48)              | 179 |
| [C <sub>4</sub> mim][PF <sub>6</sub> ]  | Poly(4-phenylazophenyl methacrylate- <i>r</i> - <i>N</i> -isopropylacrylamide)- <i>b</i> -poly(ethylene oxide)- <i>b</i> -poly(4-phenylazophenyl methacrylate- <i>r</i> - <i>N</i> -isopropylacrylamide)                               | 20 wt% | Sol-gel (@ 47-55)           | 193 |
| [C <sub>4</sub> mim][PF <sub>6</sub> ]  | Poly(4-phenylazophenyl methacrylate- <i>r</i> - <i>N</i> -isopropylacrylamide)- <i>b</i> -poly(ethylene oxide)- <i>b</i> -poly(4-phenylazophenyl methacrylate- <i>r</i> - <i>N</i> -isopropylacrylamide)                               | 20 wt% | Sol-gel (@ 37-45)           | 194 |
| [C <sub>4</sub> mim][PF <sub>6</sub> ]  | Poly(glycidyl methyl ether)                                                                                                                                                                                                            | 10 wt% | LCST (@ 53.5)               | 173 |
| [C <sub>4</sub> mim][PF <sub>6</sub> ]  | Poly(ethoxyethyl glycidyl ether)                                                                                                                                                                                                       | 10 wt% | LCST (@ 56.0)               | 173 |
| [C <sub>4</sub> mim][PF <sub>6</sub> ]  | Poly(ethyl glycidyl ether)- <i>b</i> -poly(ethylene oxide)                                                                                                                                                                             | 1 wt%  | LCMT (@ 15)                 | 180 |
| [C <sub>8</sub> mim][PF <sub>6</sub> ]  | Poly(ethyl glycidyl ether)                                                                                                                                                                                                             | 10 wt% | LCST (@ 67.0)               | 173 |

**Table S9.** Overview of polymers exhibiting a thermoresponsive behaviour in other organic solvents in order of polarity.

| Solvent       | Type of polymer                                                                                  | Polymer conc          | Phase transition type (Temp °C) | Ref |
|---------------|--------------------------------------------------------------------------------------------------|-----------------------|---------------------------------|-----|
| Diethyl ether | Poly(octadecyl vinyl ether)                                                                      | 1 wt%                 | UCST (~12)                      | 109 |
| Diethyl ether | Poly(hexadecyl vinyl ether)                                                                      | 1 wt%                 | UCST (ND)                       | 109 |
| THF           | Poly(octadecyl vinyl ether)                                                                      | 1 wt%                 | UCST (ND)                       | 147 |
| THF           | Poly(octadecyl vinyl ether)                                                                      | 1 wt%                 | UCST (~7)                       | 109 |
| THF           | Poly[2-(4,4,5,5,6,6,7,7,7-nonafluoroheptyloxy)ethyl vinyl ether]                                 | 1 wt%                 | UCST (~8)                       | 153 |
| THF/BuOH      | Poly[2-(vinylxy)-ethyl-1-butylimidazolium chloride]                                              | 1 wt%                 | LCST (~40)                      | 155 |
| THF/hexane    | Poly(2-chloroethyl vinyl ether- <i>alt</i> -maleic anhydride)                                    | 0.1 wt%               | LCST (~ 25)                     | 149 |
| THF/hexane    | Poly(2-chloroethyl vinyl ether- <i>alt</i> -maleic anhydride)                                    | 0.02-7 wt%            | LCST                            | 207 |
| THF           | Hyperbranched 3-ethyl-3-(hydroxymethyl)oxetane core/glycidyl- <i>graft</i> -PEG shell copolymers | 5 mg mL <sup>-1</sup> | UCST (@13.4-17.4)               | 199 |
| THF           | Poly(4-acryloylmorpholine)                                                                       | 6 wt%                 | UCST (~ 15)                     | 200 |
| THF           | Poly( <i>N,N</i> -diethylacrylamide)- <i>b</i> -poly(4-acryloylmorpholine)                       | 6 wt%                 | UCST (~ 20-40)                  | 200 |

|                            |                                                                                                                 |                               |                                                          |     |
|----------------------------|-----------------------------------------------------------------------------------------------------------------|-------------------------------|----------------------------------------------------------|-----|
| THF                        | Poly-( <i>p</i> -biphenylmethyl-L-glutamate                                                                     | 0.62-1.12 mg mL <sup>-1</sup> | Chiral optical transition (~-2.5)                        | 201 |
| TF                         | Poly- $\gamma$ - <i>p</i> -biphenylethoxy-L-glutamate and poly- $\gamma$ - <i>p</i> -biphenylhexoxy-L-glutamate | ~ 20 wt%                      | $\alpha$ -helix reorientation (~ 7-37) gelation (~-9-39) | 202 |
| THF                        | Poly(styrene)                                                                                                   | 5 mg mL <sup>-1</sup>         | ND                                                       | 148 |
| THF                        | Star poly(styrene)                                                                                              | 5 mg mL <sup>-1</sup>         | ND                                                       | 148 |
| 1,4-Dioxane                | Poly(11-(4-(( <i>E</i> )-4-butylstyryl)phenoxy)undecyl methacrylate)                                            | 2 wt%                         | UCST (@ 52.3)                                            | 140 |
| Methyl acetate             | Polystyrene                                                                                                     | 0.003-0.078 wt%               | LCST (@124.55-129.35) and UCST (@26.10-32.70)            | 21  |
| Ethyl acetate              | Polystyrene                                                                                                     | 0.005-0.489 wt%               | LCST (@147.2-199.2)                                      | 21  |
| Ethyl acetate              | Poly(dodecyl vinyl ether)                                                                                       | 1 wt%                         | UCST (~45)                                               | 109 |
| Ethyl acetate              | Poly(hexadecyl vinyl ether)                                                                                     | 1 wt%                         | UCST (ND)                                                | 109 |
| Ethyl acetate              | Poly(cholesteryl 2-(vinylxy)ethyl carbonate)                                                                    | 1 wt%                         | UCST (@67)                                               | 109 |
| Ethyl acetate              | Poly(octadecyl vinyl ether- <i>random</i> -isobutyl vinyl ether)                                                | 1 wt%                         | UCST (~15)                                               | 109 |
| Ethyl acetate/BuOH         | Poly[2-(vinylxy)-ethyl-1-butylimidazolium chloride]                                                             | 1 wt%                         | LCST (~65)                                               | 155 |
| <i>n</i> -Butyl acetate    | Poly(2-chloroethyl vinyl ether- <i>alt</i> -maleic anhydride)                                                   | 0.05 wt%                      | LCST (~85)                                               | 203 |
| <i>Tert</i> -butyl acetate | Polystyrene                                                                                                     | 0.005-0.3 wt%                 | LCST (@117.9-165.5) and UCST (@ -32.5-5.5)               | 21  |
| Propyl acetate/DCE         | Poly(2-chloroethyl vinyl ether- <i>alt</i> -maleic anhydride)                                                   | 0.1 wt%                       | LCST (~42-70)                                            | 149 |
| DME                        | Poly-(methacrylic acid- <i>alt</i> -hydroxyethyl acrylate)                                                      | 8 mg mL <sup>-1</sup>         | LCST (~18)                                               | 204 |
| DME                        | Poly(methacrylic acid)                                                                                          | 8 mg mL <sup>-1</sup>         | LCST (~25)                                               | 208 |
| DME                        | Poly(arylene ether sulfone)                                                                                     | 2.5 mg mL <sup>-1</sup>       | LCST (@37)                                               | 163 |
| DME                        | poly(arylene ether sulfonate)- <i>b</i> -polylactide                                                            | 15 mg mL <sup>-1</sup>        | LCST (@27.4)                                             | 163 |
| Acetone                    | Poly(octadecyl vinyl ether- <i>random</i> -isobutyl vinyl ether)                                                | 1 wt%                         | UCST (~38)                                               | 109 |
| Acetone                    | Poly[2-(4,4,5,5,6,6,7,7,7-nonafluoroheptyloxy)ethyl vinyl ether]                                                | 1 wt%                         | UCST (~14)                                               | 153 |
| DMF                        | Comb-like copolymer of <i>N</i> -phenyl maleimide and <i>n</i> -octadecyl vinyl ether                           | 1 wt%                         | UCST (@51)                                               | 117 |
| DMF                        | 4,4'-sulfonyldiphenol (SDP) based oligourethane derivative based on 1,6-hexamethylene diisocyanate              | 8 wt%                         | Sol-gel transition (@63°C)                               | 206 |
| DMF                        | 4,4'-sulfonyldiphenol (SDP)-based oligourethane derivative based on 4,4'-methylenebis(cyclohexyl isocyanate)    | 8 wt%                         | Sol-gel transition (ND)                                  | 206 |
| DMF                        | 4,4'-sulfonyldiphenol (SDP) based oligourethane derivative based on 2,4-diisocyanatotoluene                     | 8wt%                          | Sol-gel transition (ND)                                  | 206 |
| DMF                        | Poly(thioether)- <i>b</i> -polysiloxane- <i>b</i> -furfuryl poly(thioether)-bismaleimide elastomer              | n/a                           | De-crosslinking (@ 150)                                  | 205 |
| DMAc                       | Poly(styrene)                                                                                                   | 5 mg mL <sup>-1</sup>         | ND                                                       | 148 |
| DMAc                       | Star poly(styrene)                                                                                              | 5 mg mL <sup>-1</sup>         | ND                                                       | 148 |
| DMAc                       | 4,4'-sulfonyldiphenol (SDP) based oligourethane derivative based on 1,6-hexamethylene diisocyanate              | 8 wt%                         | Sol-gel transition (ND)                                  | 206 |
| DMAc                       | 4,4'-sulfonyldiphenol (SDP)-based oligourethane derivative based on 4,4'-methylenebis(cyclohexyl isocyanate)    | 8 wt%                         | Sol-gel transition (ND)                                  | 206 |
| DMAc                       | 4,4'-sulfonyldiphenol (SDP) based oligourethane derivative based on 2,4-diisocyanatotoluene                     | 8 wt%                         | Sol-gel transition (ND)                                  | 206 |
| DMSO                       | 4,4'-sulfonyldiphenol (SDP) based oligourethane derivative based on 1,6-hexamethylene diisocyanate              | 8 wt%                         | Sol-gel transition (ND)                                  | 206 |
| DMSO                       | 4,4'-sulfonyldiphenol (SDP)-based oligourethane derivative based on 4,4'-methylenebis(cyclohexyl isocyanate)    | 8 wt%                         | Sol-gel transition (ND)                                  | 206 |

|      |                                                                                                                                                            |                         |                         |            |
|------|------------------------------------------------------------------------------------------------------------------------------------------------------------|-------------------------|-------------------------|------------|
| DMSO | 4,4'-sulfonyldiphenol (SDP) based oligourethane derivative based on 2,4-diisocyanatotoluene                                                                | 8 wt%                   | Sol-gel transition (ND) | <b>206</b> |
| ACN  | Poly(3-(3-butylureido)propyl acrylate- <i>star-N</i> -[3-(acryloyloxy)propyl]- <i>N,N,N</i> -trihexammonium tetrakis(3,5-bis(trifluoromethyl)phenyl)borate | 100 mg mL <sup>-1</sup> | UCST (@57)              | <b>164</b> |
| ACN  | Polysiloxanes of poly(aminopropylmethylsiloxane) and <i>N</i> -isopropyl acrylamide                                                                        | 10 mg mL <sup>-1</sup>  | UCST (@36.2-62.7)       | <b>96</b>  |
